# Supplementary material
Source: bioRxiv or medRxiv preprint supplement (https://medrxiv.org/highwire/filestream/70807/field_highwire_adjunct_files/0/2019.12.19.19015255-1.pdf)
Supplement: Supplementary file [file 2019.12.19.19015255-1.pdf]

## SUPPLEMENTAL FIGURE LEGEND

**Table e-1: Brain morphology measurement statistics for adults with NF1 and unaffected control participants.** Statistical significance value indicated represents post-FDR adjustment for 28 measurements. Abbreviations used in the figure: SD = standard deviation, N = number of participants included.

**Table e-2: Correlation values and p-values of corpus callosum measurements with clinical and neuropsychometric assessments in adults with NF1.** Top three corpus callosum PCs are correlated to neuropsychometric measurements (clinical severity, clinical neurological severity, clinical ADD/ADHD diagnosis, IQ, and Attention Comparison Score). The correlation matrix combines the Pearson correlation and Spearman correlation (bolded) results. P-values were not adjusted. Abbreviations used in the table: Clin. Sev. = clinical NF1 severity, Neuro. Sev. = clinical neurological severity, ADD/ADHD = clinical Attention deficit hyperactivity disorder severity, IQ = intelligence quotient, ACS = Attention Comparison Score, and PC = principal component.

**Table e-3: Correlation values and p-values of brainstem measurements with clinical and neuropsychometric assessments in adults with NF1.** Top three brainstem PCs are correlated to neuropsychometric measurements (clinical severity, clinical neurological severity, clinical ADD/ADHD diagnosis, IQ, and Attention Comparison Score). The correlation matrix combines the Pearson correlation and Spearman correlation (bolded) results. P-values were not adjusted. Abbreviations used in the table: Clin. Sev. = clinical NF1 severity, Neuro. Sev. = clinical neurological severity, ADD/ADHD = clinical Attention deficit hyperactivity disorder severity, IQ = intelligence quotient, ACS = Attention Comparison Score, and PC = principal component.

**Table e-4: Correlation values and p-values of ocular globe measurements with clinical and neuropsychometric assessments in adults with NF1.** Top five corpus callosum PCs are correlated to neuropsychometric measurements (clinical severity, clinical neurological severity, clinical ADD/ADHD diagnosis, IQ, and Attention Comparison Score). The correlation matrix combines the Pearson correlation and Spearman correlation (bolded) results. P-values were not adjusted. Abbreviations used in the table: Clin. Sev. = clinical NF1 severity, Neuro. Sev. = clinical neurological severity, ADD/ADHD = clinical Attention deficit hyperactivity disorder severity, IQ = intelligence quotient, ACS = Attention Comparison Score, and PC = principal component.

**Figure e-1: Corpus callosum bulbosity averages for adults with NF1 and unaffected control participants partitioned by sex.** Averages are compared between males and females within the two groups (adults with NF1 and unaffected control participants) and between groups. None of the comparisons is significant after FDR adjustment for 26 comparisons.

**Figure e-2: Scree plots of principal components of brain morphology measurements in adults with NF1.** (A) Corpus callosum, (B) ocular globe, and (C) brainstem principal components' eigenvalues. Cut off line set at eigenvalue = 1. First three (A), first five (B), and first three (C) principal components are above the cut off line for corpus callosum, ocular globes,

and brainstem. Principal components greater than cut off are used for correlation to clinical and neuropsychometric assessment analysis. Abbreviation used in figure: PC = principal component.

**Figure e-3: Correlation matrixes of ocular globe measurements with clinical and neuropsychometric assessments in adults with NF1.** Top five ocular globe PCs are correlated to neuropsychometric measurements (clinical severity, clinical neurological severity, clinical ADD/ADHD diagnosis, IQ, and Attention Comparison Score). The correlation matrix combines the Pearson correlation and Spearman correlation results. Pearson correlations was conducted for comparisons between clinical severity, clinical neurological severity, clinical ADD/ADHD diagnosis, and the PCs. Spearman correlations was conducted for comparisons between IQ, ACS, and the PCs. The colour scale represents the degree of correlation from -1 (red) to 1 (blue). The size of the circles also represents the size of the correlation, with values closer to -1 or 1 larger than those that are closer to 0. Abbreviations used in the figure: Clin. Sev. = clinical NF1 severity, Neuro. Sev. = clinical neurological severity, ADD/ADHD = clinical Attention deficit hyperactivity disorder severity, IQ = intelligence quotient, ACS = Attention Comparison Score, and PC = principal component.
